# Supplementary material for: Microbial signals drive pre-leukaemic myeloproliferation in a Tet2-deficient host
Source: Springer Nature journal article supplement (doi:10.1038/s41586-018-0125-z), 2018-05-01

In the format provided by the authors and unedited.

# Microbial signals drive pre-leukaemic myeloproliferation in a *Tet2*-deficient host

Marlies Meisel<sup>1,2,15</sup>, Reinhard Hinterleitner<sup>1,2,15</sup>, Alain Pacis<sup>3,4</sup>, Li Chen<sup>1,2</sup>, Zachary M. Earley<sup>1,2</sup>, Toufic Mayassi<sup>1,2</sup>, Joseph F. Pierre<sup>1,5</sup>, Jordan D. Ernest<sup>1,2</sup>, Heather J. Galipeau<sup>6</sup>, Nikolaus Thuille<sup>7</sup>, Romain Bouziat<sup>1,2</sup>, Manuel Buscarlet<sup>8</sup>, Daina L. Ringus<sup>1</sup>, Yitang Wang<sup>9</sup>, Ye Li<sup>9</sup>, Vu Dinh<sup>1,2</sup>, Sangman M. Kim<sup>1,2</sup>, Benjamin D. McDonald<sup>1,9</sup>, Matthew A. Zurenski<sup>1,2</sup>, Mark W. Musch<sup>1</sup>, Glaucia C. Furtado<sup>10</sup>, Sergio A. Lira<sup>10</sup>, Gottfried Baier<sup>7</sup>, Eugene B. Chang<sup>1</sup>, A. Murat Eren<sup>1,11</sup>, Christopher R. Weber<sup>9</sup>, Lambert Busque<sup>8,12</sup>, Lucy A. Godley<sup>1,13</sup>, Elena F. Verdú<sup>6</sup>, Luis B. Barreiro<sup>3,14</sup> & Bana Jabri<sup>1,2,9\*</sup>

<sup>1</sup>Department of Medicine, University of Chicago, Chicago, IL, USA. <sup>2</sup>Committee on Immunology, University of Chicago, Chicago, IL, USA. <sup>3</sup>Department of Genetics, CHU Sainte-Justine Research Center, Montreal, Quebec, Canada. <sup>4</sup>Department of Biochemistry, Faculty of Medicine, Université de Montréal, Montreal, Quebec, Canada. <sup>5</sup>Department of Pediatrics, University of Tennessee Health Science Center, Memphis, TN, USA. <sup>6</sup>Farncombe Family Digestive Health Research Institute, McMaster University, Hamilton, Ontario, Canada. <sup>7</sup>Translational Cell Genetics, Department for Pharmacology and Genetics, Medical University of Innsbruck, Innsbruck, Austria. <sup>8</sup>Research Centre, Hôpital Maisonneuve-Rosemont, Montreal, Quebec, Canada. <sup>9</sup>Department of Pathology and Pediatrics, University of Chicago, Chicago, IL, USA. <sup>10</sup>Immunology Institute, Icahn School of Medicine at Mount Sinai, New York, NY, USA. <sup>11</sup>Marine Biological Laboratory, Woods Hole, MA, USA. <sup>12</sup>Hematology Division, Hôpital Maisonneuve-Rosemont, Université de Montréal, Montreal, Quebec, Canada. <sup>13</sup>Section of Hematology/Oncology, University of Chicago, Chicago, IL, USA. <sup>14</sup>Department of Pediatrics, Faculty of Medicine, Université de Montréal, Montreal, Quebec, Canada. <sup>15</sup>These authors contributed equally: Marlies Meisel, Reinhard Hinterleitner. \*e-mail: [bjabri@bsd.uchicago.edu](mailto:bjabri@bsd.uchicago.edu)

# Supplementary Figure 1

## a HSC gating (post lineage depletion)

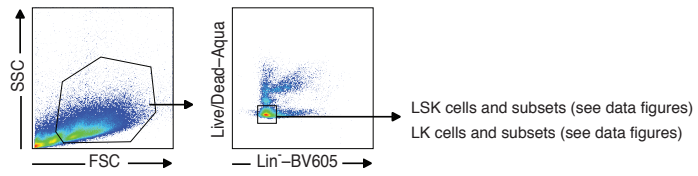

## b Myeloid cell gating (same for blood and spleen)

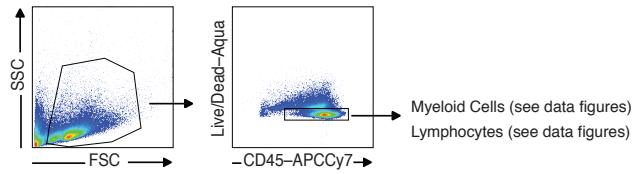

Supplement: 41586_2018_125_MOESM1_ESM.pdf [file 41586_2018_125_MOESM1_ESM.pdf]
